# Supplementary material for: Constraint of gene expression by the chromatin remodelling protein CHD4 facilitates lineage specification
Source: PubMed Central journal article supplement (PMC4529036; doi:10.1242/dev.125450), 2015-08-01
Supplement: supp_dev.125450_DEV125450supp.pdf [file supp_dev.125450_DEV125450supp.pdf]

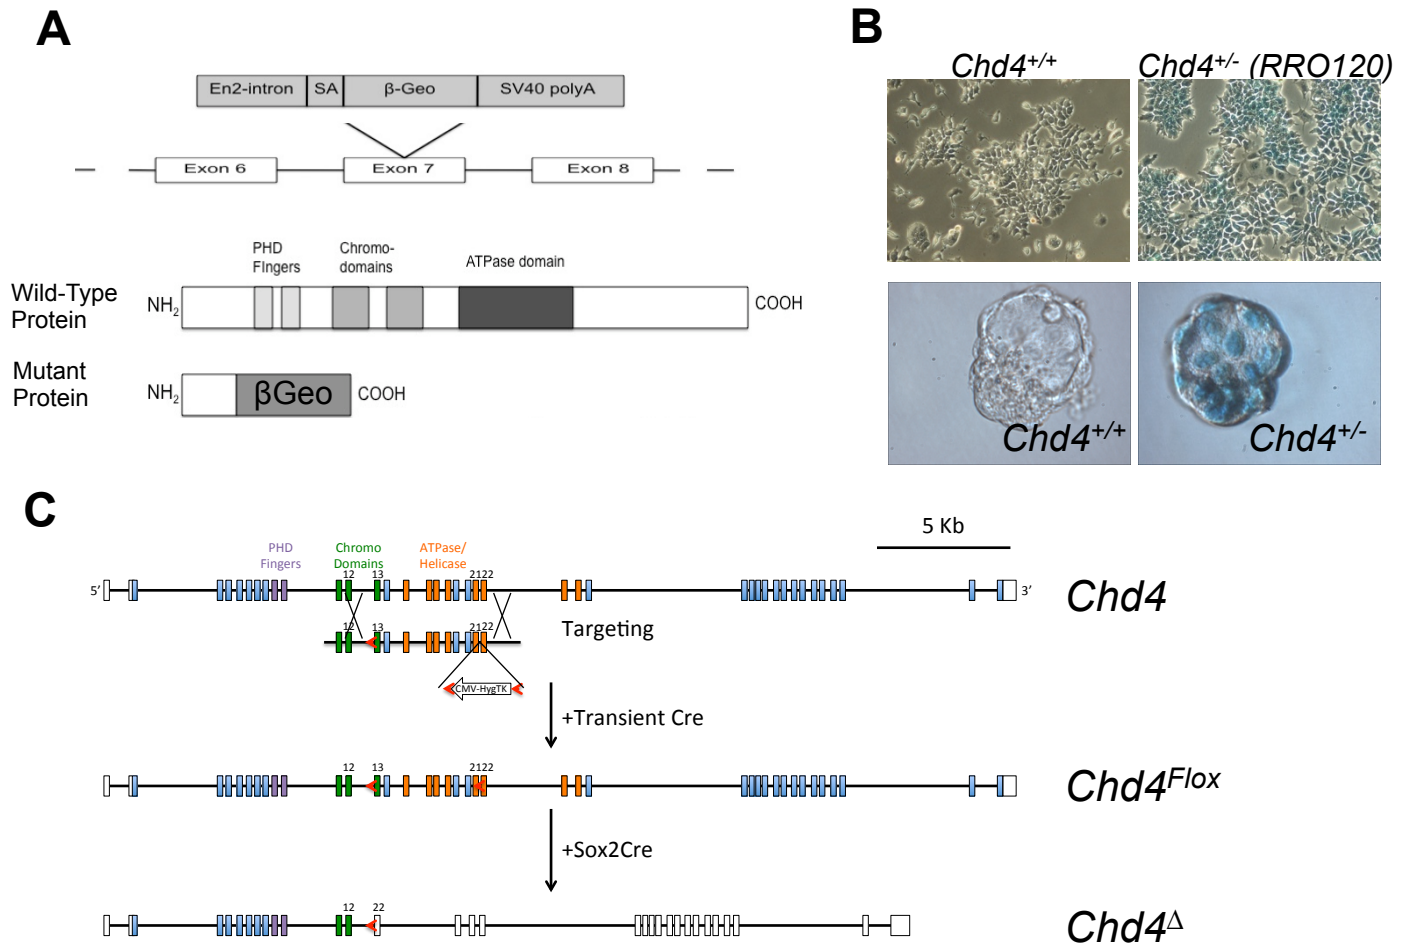

### Supplemental Figure 1. *Chd4* mutant alleles

(A) Diagrammatic representation of the RRO120 *Chd4* gene-trap allele. Below are representations of the CHD4 wild-type protein and the truncated  $\beta$ -Geo-fusion protein expressed from the *Chd4* gene-trap locus. (B) X-Gal staining (blue) of wild-type and *Chd4*<sup>+/-</sup> ES cells (RRO120) (top) and blastocysts (bottom). (C) Diagrammatic representation of the creation of a conditional *Chd4* allele. A depiction of the *Chd4* gene is shown, with filled boxes representing coding exons and unfilled boxes representing non-coding exons. The targeting construct is shown below, containing one LoxP site (red arrow) between exons 12 and 13, and a floxed drug selection marker in the antisense orientation located between exons 21 and 22. After homologous recombination cells were treated with a low level of Cre recombinase to delete only the drug selection marker, resulting in a *Chd4*<sup>Flox</sup> allele. These cells were used to make *Chd4*<sup>Flox/+</sup> mice, which were then crossed to mice expressing Cre under the Sox2 promoter (Hayashi, *et al*, 2002) to create the *Chd4*<sup>Δ</sup> allele.

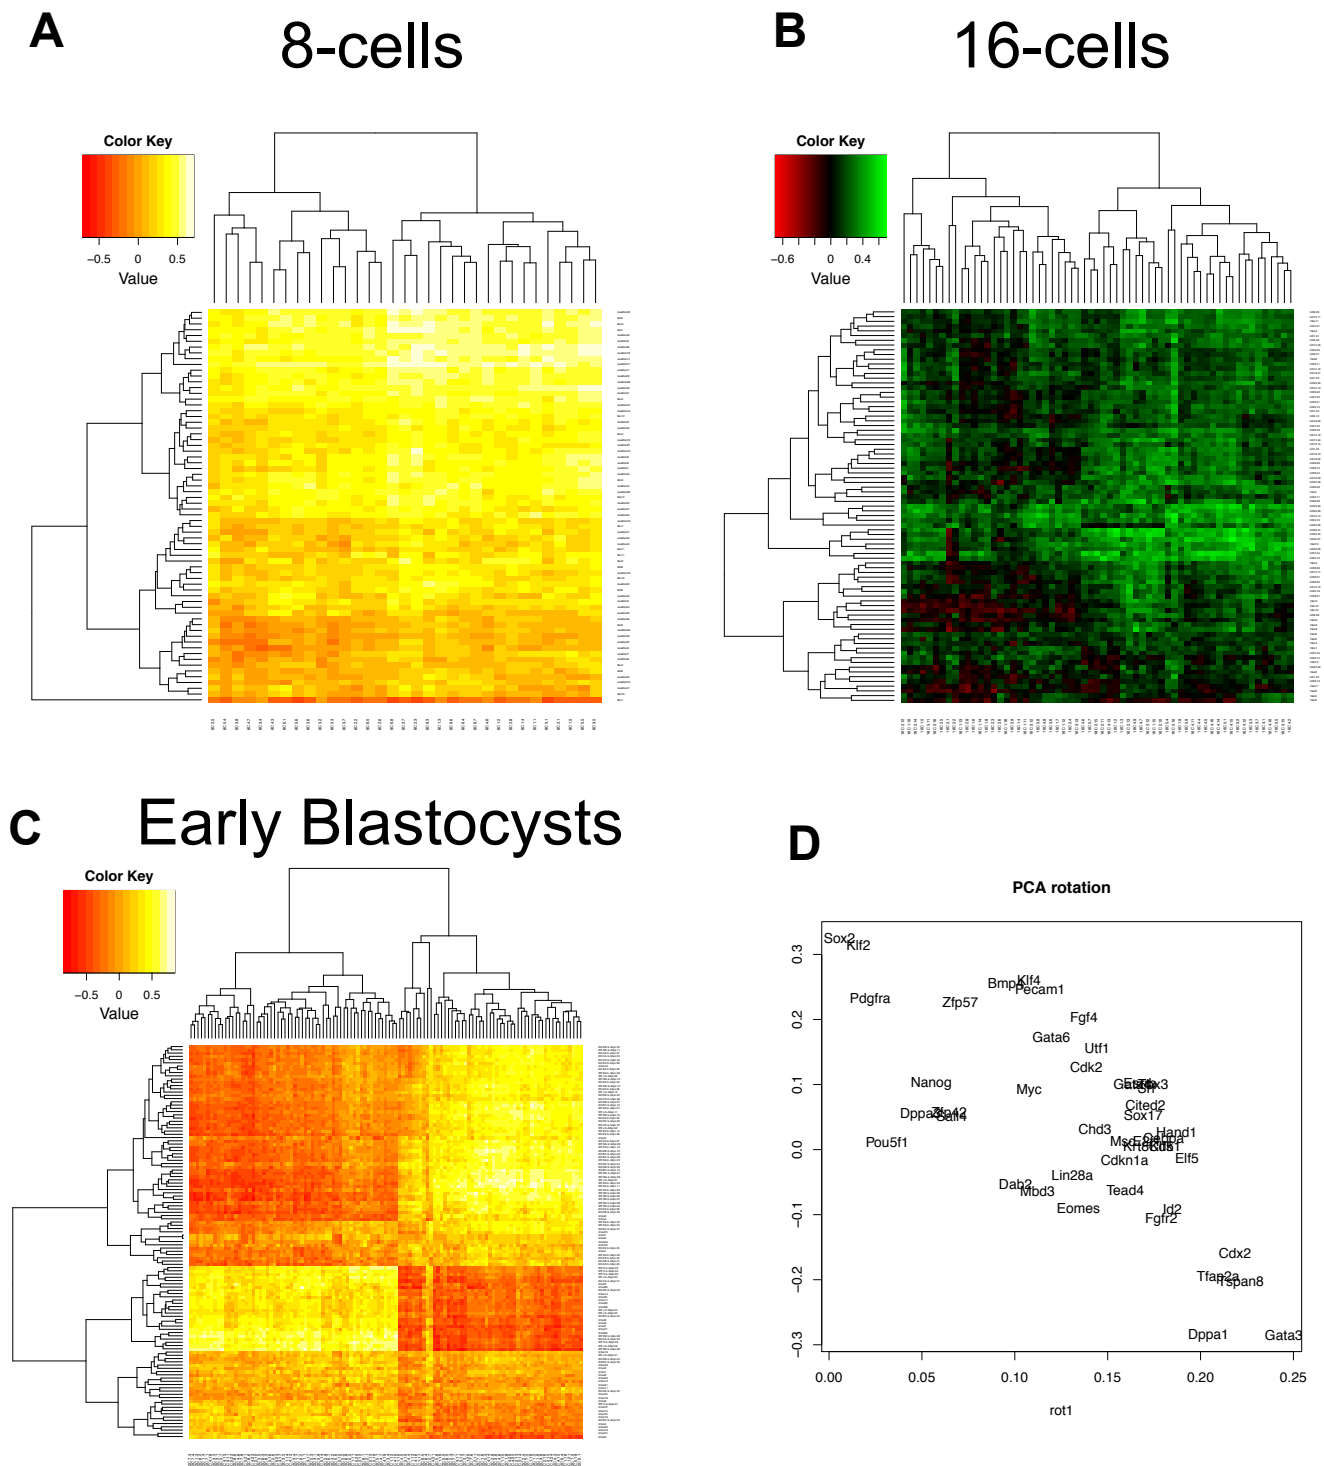

**Supplemental Figure 2. Correlation plots of single cell gene expression data**

Correlation plots comparing data described here with those presented in (Guo, *et al*, 2010) for (A) 8-cell embryos, (B) 16-cell embryos, and (C) early blastocysts. In (A) – (C) cells from this study are arranged vertically, and that from Guo et al. are listed across the horizontal. Good correlation exists in all comparisons. (D) Loadings for PCA plots in Fig. 4D.



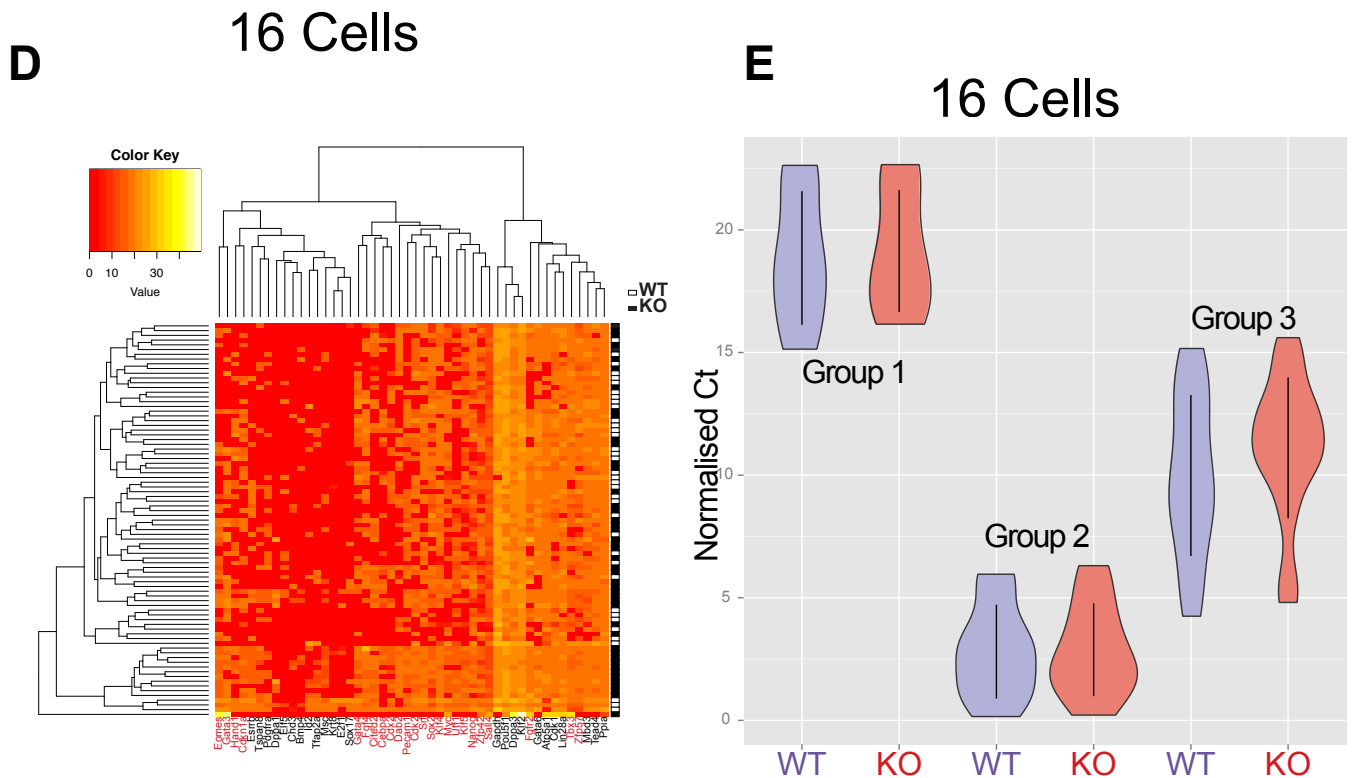

**Supplemental Figure 3.** Normalising single cell gene expression data (Figures 4 and 5) to housekeeping gene expression levels does not change data interpretation. The same analyses as shown in Figs. 4B, 4C, 5A and 5C are shown for data normalised to housekeeping gene expression in panels A, C, D, and E, respectively. Panel (B) plots the number of cells from the early blastocyst data which were clustered into the ICM, TE or NS categories after normalising data to mean expression (top) or housekeeping genes (bottom). In Panel D, those genes included in Group 3 (Fig. 5A) are indicated in red text. The two normalisation methods give very similar results.

## Supplementary Movies

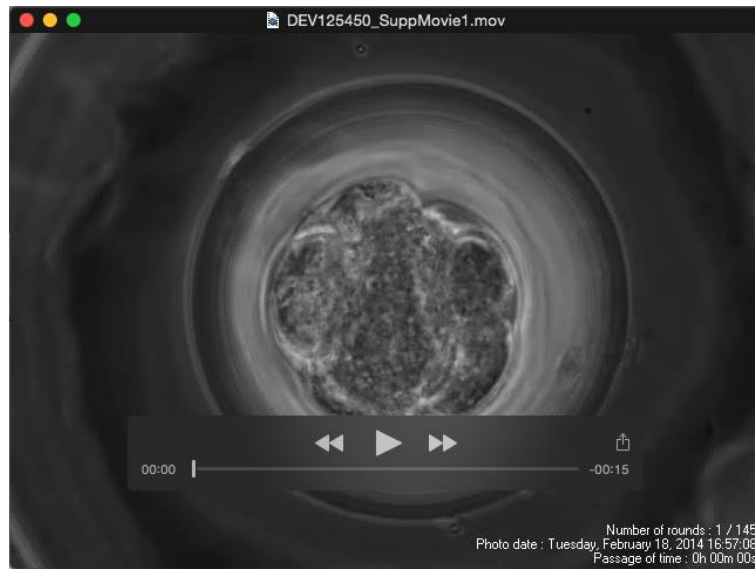

**Supplementary Movie 1.** Wild-type 16-cell embryo developing *in vitro* over 48 hours.

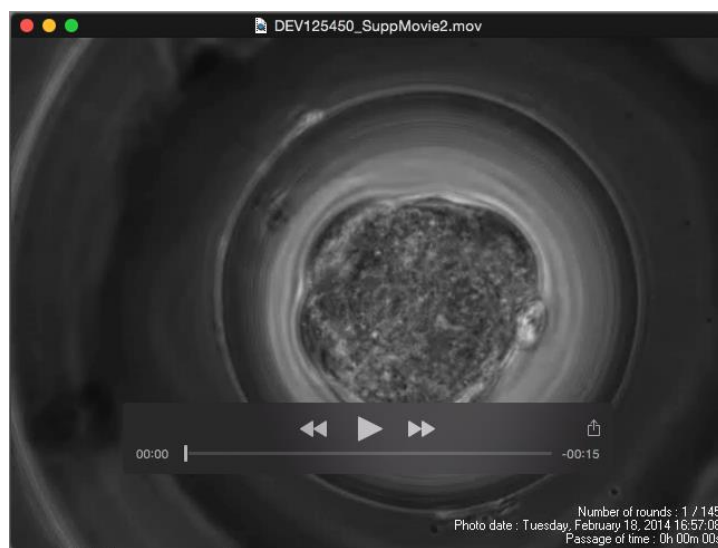

**Supplementary Movie 2.** *Chd4* heterozygous 16-cell embryo developing *in vitro* over 48 hours.

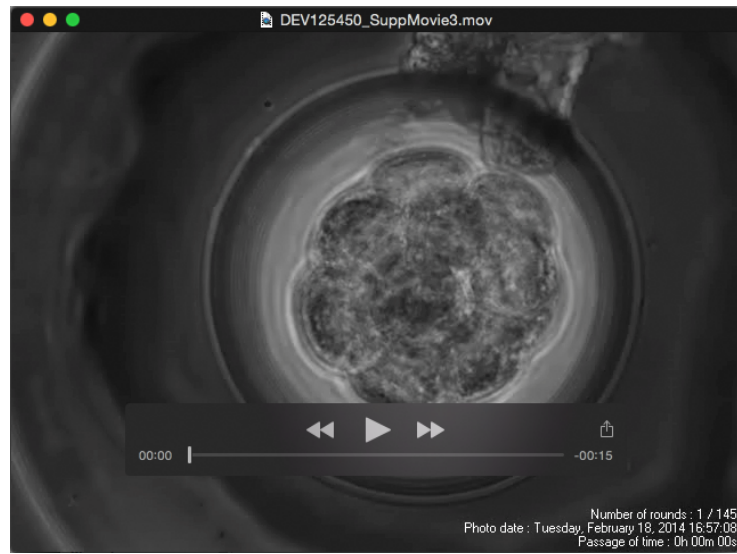

**Supplementary Movie 3.** *Chd4*<sup>+/+</sup> 16-cell embryo developing *in vitro* over 48 hours.

**Table S1. Genes and assay IDs for OpenArray gene expression analysis**

| <b>Gene</b> | <b>Assay ID</b> |
|-------------|-----------------|
| Atp5a1      | Mm00431960_m1   |
| Bmp4        | Mm00432087_m1   |
| Cdk1        | Mm00772472_m1   |
| Cdk2        | Mm00443947_m1   |
| Cdkn1a      | Mm04205640_g1   |
| Cdx2        | Mm01212280_m1   |
| Cebpa       | Mm00514283_s1   |
| Chd3        | Mm01332658_m1   |
| Chd4        | Mm01190896_m1   |
| Cited2      | Mm00516121_m1   |
| Dab2        | Mm01307290_m1   |
| Dppa1       | Mm00626454_m1   |
| Dppa3       | Mm01184198_g1   |
| E2f1        | Mm00432936_m1   |
| Elf5        | Mm00468732_m1   |
| Eomes       | Mm01351985_m1   |
| Esrrb       | Mm00442411_m1   |
| Fgf4        | Mm00438917_m1   |
| Fgf8        | Mm00438922_m1   |
| Fgfr2       | Mm01269930_m1   |
| Gapdh       | Mm99999915_g1   |
| Gata3       | Mm00484683_m1   |
| Gata4       | Mm00484689_m1   |
| Gata6       | Mm00802636_m1   |

|        |               |
|--------|---------------|
| Hand1  | Mm00433931_m1 |
| Hprt   | Mm01545399_m1 |
| Id2    | Mm00711781_m1 |
| Klf2   | Mm01244979_g1 |
| Klf4   | Mm00516104_m1 |
| Klf5   | Mm00456521_m1 |
| Krt8   | Mm04209403_g1 |
| Lin28a | Mm00524077_m1 |
| Mbd3   | Mm00488961_m1 |
| Msc    | Mm00447887_m1 |
| Myc    | Mm00487804_m1 |
| Nanog  | Mm02384862_g1 |
| Nr0b1  | Mm00431729_m1 |
| Pdgfra | Mm00440701_m1 |
| Pecam1 | Mm01242584_m1 |
| Pou5f1 | Mm03053917_g1 |
| Ppia   | Mm02342430_g1 |
| Sall4  | Mm00453037_s1 |
| Sox17  | Mm00488363_m1 |
| Sox2   | Mm03053810_s1 |
| Srf    | Mm00491032_m1 |
| T      | Mm01318252_m1 |
| Tbx3   | Mm01195726_m1 |
| Tcf3   | Mm01175588_m1 |
| Tead4  | Mm01189836_m1 |
| Tfap2a | Mm00495574_m1 |
| Tspan8 | Mm00524563_m1 |



|       |               |
|-------|---------------|
| Utf1  | Mm00447703_g1 |
| Wnt4  | Mm01194003_m1 |
| Wnt5a | Mm00437347_m1 |
| Zfp42 | Mm03053975_g1 |
| Zfp57 | Mm00456405_m1 |

**Table S2.**

[Click here to Download Table S2](#)
